# Supplementary material for: Feasibility of using 454 pyrosequencing for studying quasispecies of the whole dengue viral genome
Source: PubMed Central journal article supplement (PMC3521222; doi:10.1186/1471-2164-13-s7-s7), 2012-12-07
Supplement: 1471-2164-13-S7-S7-S1.pdf [file 1471-2164-13-S7-S7-S1.pdf]

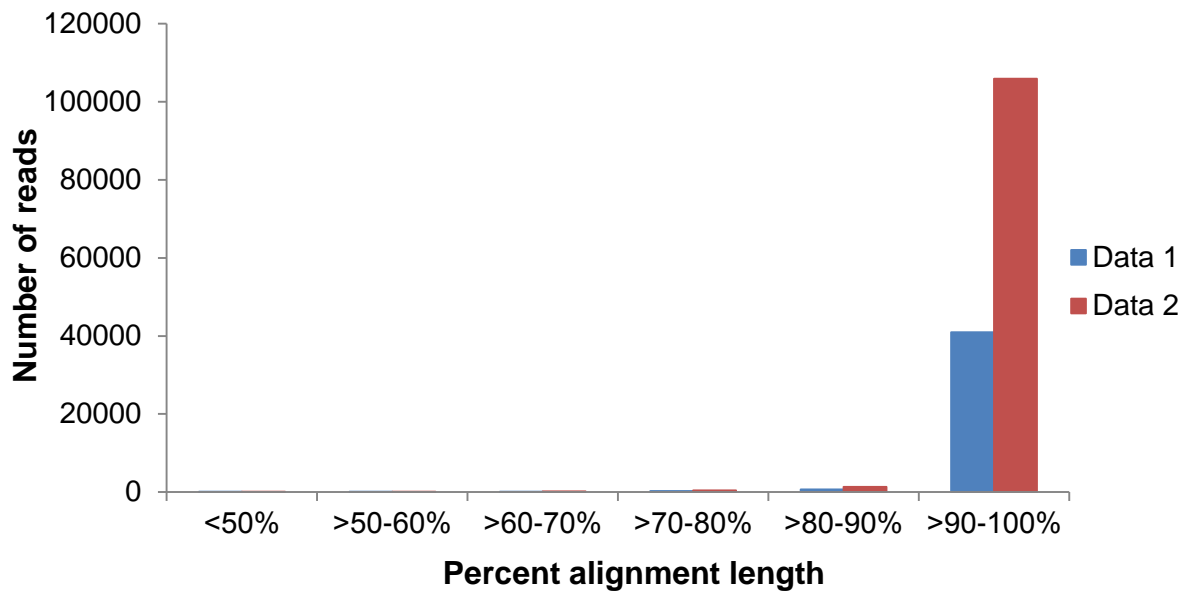

**Figure S1. Histogram plot number of reads with percent alignment length**

Histogram shows number of reads in each range of percent alignment with reference sequence. The large group of reads can be aligned to reference sequence more than 90% of their length.

**Table S1. Summary result of consensus alignment with another consensus sequence, reference sequence or Sanger Base sequencing result**

| Dengue serotype                                                                | 1     | 2-16681 | 3     | 4     |
|--------------------------------------------------------------------------------|-------|---------|-------|-------|
| <b>Alignment between consensus sequence from data 1 and data 2 by BLASTn</b>   |       |         |       |       |
| % identity                                                                     | 99.97 | 100.00  | 99.99 | 99.98 |
| alignment length                                                               | 10700 | 10688   | 10650 | 10616 |
| Mismatches                                                                     | 1     | 0       | 0     | 0     |
| <b>Alignment between consensus sequence from data 2 and reference sequence</b> |       |         |       |       |
| % identity                                                                     | 95.29 | 99.91   | 99.66 | 99.88 |
| alignment length                                                               | 10700 | 10688   | 10650 | 10616 |
| Mismatches                                                                     | 504   | 10      | 36    | 13    |
| <b>Compare mismatch from above with Sanger Base Sequencing result</b>          |       |         |       |       |
| Total mismatch falling in region of Sanger result                              | 302   | 8       | 22    | 4     |
| Total mismatch has the same result with Sanger                                 | 302   | 8       | 22    | 4     |
| Total mismatch has the different result with Sanger                            | 0     | 0       | 0     | 0     |

**Table S2. Primers for preparing DNA template in data 1**

| Serotype | Primer name | primer sequence           | Primer Tm | Product size |
|----------|-------------|---------------------------|-----------|--------------|
| Dengue 1 | D1Fw1       | AGTTGTTAGTCTACGTGGACCG    | 66        | 2313         |
|          | D1Rv1       | CCTATTCCCTATTTTCATGGTCCA  | 64        |              |
|          | D1Fw2       | CATGGGACTTCGGTTCTATAGG    | 66        | 2332         |
|          | D1Rv2       | GATCTCTGTTTCTTTTTCTGCCAA  | 66        |              |
|          | D1Fw3       | TCCTGGGAAGAAGAAGCAGAACA   | 68        | 2273         |
|          | D1Rv3       | ACTCCACCAGTCAACACAGCTAT   | 68        |              |
|          | D1Fw4       | TGCACAACCTCCGAACAAGGAGG   | 68        | 2335         |
|          | D1Rv4       | GCTCCAATAGCTGCGTTTGACC    | 68        |              |
|          | D1Fw5       | AATAGCCATGACTGACACCACAC   | 68        | 2111         |
|          | D1Rv5       | TGGCGTTCTGTGCCTGGAATGAT   | 70        |              |
| Dengue 2 | D2Fw1       | AGTTGTTAGTCTACGTGGACCG    | 66        | 2348         |
|          | D2Rv1       | CGTGAATTCATTCCTATCCATGT   | 64        |              |
|          | D2Fw2       | TCTTAGGTCGCCTGATCACA      | 60        | 2533         |
|          | D2Rv2       | ACTTCCCACAGGTACCATGC      | 62        |              |
|          | D2Fw3       | GGATGGTGAGCATTTTtagcagTTC | 74        | 2544         |
|          | D2Rv3       | CCAGTATTATTGAAGCTGCTATCCA | 70        |              |
|          | D2Fw4       | AATCACAGAAATGGGTAGGCT     | 60        | 2208         |
|          | D2Rv4       | GTCATTGCCATCTGTGTCACC     | 64        |              |
|          | D2Fw5       | ATCATGGCACTATGACCAAGACC   | 68        | 2250         |
|          | D2Rv5       | TGGCGTTCTGTGCCTGGAATGAT   | 70        |              |
| Dengue 3 | D3Fw1       | TACGTGGACCGACAAGAACAGTTT  | 70        | 2422         |
|          | D3Rv1       | TTTATGACACACCCCATGTCAGC   | 68        |              |
|          | D3Fw2       | GGACTTTGGTTCAGTGGGTGGTG   | 72        | 2398         |
|          | D3Rv2       | CCTATAGACCCCTCTTCCAGTTC   | 74        |              |
|          | D3Fw3       | CAGTTGATGATGATGGAACAATGAG | 70        | 2347         |
|          | D3Rv3       | ACTATAGCCGACGCGATCCATTG   | 70        |              |
|          | D3Fw4       | CATGCAGTGGAGGAACACTACCAGA | 70        | 2430         |
|          | D3Rv4       | CATCATGTTGTAAACGCAGCTTCC  | 70        |              |
|          | D3Fw5       | CCCATGGTGACACAGATGGCAAT   | 70        | 2095         |
|          | D3Rv5       | TGGCGTTCTGTGCCTGGAATGAT   | 70        |              |
| Dengue 4 | D4Fw1       | GTCTGTGTGGACCGACAAGGAC    | 70        | 2292         |
|          | D4Rv1       | CATCCATGAGACTCCTCCAAACAT  | 70        |              |
|          | D4Fw2       | ACACTCCATTGGTTCAGGAAAGG   | 68        | 2288         |
|          | D4Rv2       | GAGAAAGAGCCATCTTCATCCTG   | 68        |              |
|          | D4Fw3       | TAACGAGGGCATAATGGCTGTGG   | 70        | 2562         |
|          | D4Rv3       | ATGATTGAGGCCGCTATCCACTG   | 70        |              |
|          | D4Fw4       | CCAAAATGGTTAGATGCACGTGT   | 66        | 2195         |
|          | D4Rv4       | GCTTCATAGCTTCCATGATACGC   | 68        |              |
|          | D4Fw5       | GCAGGAACGAGAAGTGTCTCCAC   | 72        | 2290         |
|          | D4Rv5       | TGGCGTTCTGTGCCTGGAATGAT   | 70        |              |

**Table S3. Primers for preparing DNA template in data 2**

| Serotype | Primer name | primer sequence           | Primer Tm | Product size |
|----------|-------------|---------------------------|-----------|--------------|
| Dengue 1 | D1Fw1       | AGTTGTTAGTCTACGTGGACCG    | 66        | 6579         |
|          | D1Rv3       | ACTCCACCAGTCAACACAGCTAT   | 68        |              |
|          | D1Fw4       | TGCACAACCTCCGAACAAGGAGG   | 68        | 4233         |
|          | D1Rv5       | TGGCGTTCTGTGCCTGGAATGAT   | 70        |              |
| Dengue 2 | D2Fw1       | AGTTGTTAGTCTACGTGGACCG    | 66        | 6709         |
|          | D2Rv3       | CCAGTATTATTGAAGCTGCTATCCA | 70        |              |
|          | D2Fw4       | AATCACAGAAATGGGTAGGCT     | 60        | 4296         |
|          | D2Rv5       | TGGCGTTCTGTGCCTGGAATGAT   | 70        |              |
| Dengue 3 | D3Fw1       | TACGTGGACCGACAAGAACAGTTT  | 70        | 6688         |
|          | D3Rv3       | ACTATAGCCGACGCGATCCATTG   | 70        |              |
|          | D3Fw4       | CATGCAGTGGAGGAACTACCAGA   | 70        | 4165         |
|          | D3Rv5       | TGGCGTTCTGTGCCTGGAATGAT   | 70        |              |
| Dengue 4 | D4Fw1       | GTCTGTGTGGACCGACAAGGAC    | 70        | 6698         |
|          | D4Rv3       | ATGATTGAGGCCGCTATCCACTG   | 70        |              |
|          | D4Fw4       | CCAAAATGGTTAGATGCACGTGT   | 66        | 4330         |
|          | D4Rv5       | TGGCGTTCTGTGCCTGGAATGAT   | 70        |              |
